# Supplementary material for: Identification and removal of ribosomal RNA sequences from metatranscriptomes
Source: PubMed Central journal article supplement — Bioinformatics. 2011 Dec 6;28(3):433–5. doi: 10.1093/bioinformatics/btr669 (PMC3268242; doi:10.1093/bioinformatics/btr669), 2011-12-06
Supplement: supp_btr669_SupplementaryFile1.pdf [file supp_btr669_SupplementaryFile1.pdf]

## Benchmarked programs

**meta\_rna version 3** was downloaded from:

[http://weizhong-lab.ucsd.edu/meta\\_rna/](http://weizhong-lab.ucsd.edu/meta_rna/)

The required HMMER-3.0 was downloaded from:

<http://selab.janelia.org/software/hmmer3/3.0/>

**BLAST version 2.2.25** was downloaded from:

<ftp://ftp.ncbi.nih.gov/blast/executables/release/LATEST/>

**riboPicker version 0.4.2** was downloaded from:

<http://ribopicker.sourceforge.net>

## Commands used to identify rRNA sequences

meta\_rna3:

```
$ rna_hmm3.py -k "arc,bac" -L <dir> -i <file.fasta>
```

BLAST:

```
$ blastall -p blastn -m 8 -a 1 -d <db> -i <file.fasta>
```

riboPicker:

```
$ perl ribopicker.pl -no_seq_out -keep_tmp_files -z 3 -dbs <db> -  
out_dir <dir> -f <file.fasta>
```

Fine-tuning the options based on the characteristics of the input data may yield better performance. The benchmarks were performed on a machine with two Intel® Xeon® X5650 6C 12T 2.66GHz processors.

## Reference data

### Simulated data

NCBI bacterial genomes were downloaded from (10/16/2011):

<ftp://ftp.ncbi.nlm.nih.gov/genomes/Bacteria/all.gbkg.tar.gz>

Human Microbiome Project (HMP) bacterial genomes were downloaded from:

[http://downloads.hmpdacc.org/data/reference\\_genomes/all\\_gbkg\\_20110912.tar.gz](http://downloads.hmpdacc.org/data/reference_genomes/all_gbkg_20110912.tar.gz)

The bacterial genome sequences were split into rRNA sequences and non-rRNA sequences based on their annotations (given in the GBK files). Sequences were considered as rRNA if they were annotated with the Feature "rRNA" and with a product that suggested a 5S, 16S, or 23S sequence (annotations were corrected for typos and ambiguities).

The rRNA sequences were used to generate three datasets each with 5,000 randomly selected sequences of 200 bp, 500 bp and 1,000 bp length. The non-rRNA sequences were used to generate three datasets each with 45,000 randomly selected sequences of 200 bp, 500 bp and 1,000 bp length. Error rates of exactly 2% and 5% (with 15% indels and 85% substitutions) were then simulated for each of the datasets resulting in 27 datasets total (available at the SourceForge repository of riboPicker).

### Real data

To assess the performance of riboPicker compared to BLASTn and meta\_rna3, we used public datasets available from the NCBI SRA. Datasets were downloaded in SRA-lite format and converted to FASTA format using the NCBI SRA Toolkit available at:

```
http://trace.ncbi.nlm.nih.gov/Traces/sra/sra.cgi?cmd=show&f=software&m=software&s=software
```

The datasets were then preprocessed using PRINSEQ (Schmieder and Edwards, 2011) to remove short reads (most likely of low quality), read duplicates and reads with more than 1% of the ambiguous base N. The following command was used:

```
$ perl prinseq-lite.pl -log -verbose -derep 12345 -min_len 200 -
ns_max_p 1 -fasta <file.fasta> -out_good <file.out>
```

**Table 1:** Overview of the datasets used to compare the programs.

| SRA ID    | Type | Env.   | #Raw Sequences | Mean Length | #Sequences filtered | Reference               |
|-----------|------|--------|----------------|-------------|---------------------|-------------------------|
| SRR099254 | MT   | Marine | 179,643        | 241.09      | 90,472 (50.36%)     | (Ottesen et al., 2011)  |
| SRR099253 | MT   | Marine | 160,364        | 241.89      | 79,383 (49.50%)     | (Ottesen et al., 2011)  |
| SRR171683 | MT   | Marine | 118,595        | 226.80      | 61,467 (51.83%)     | (Ottesen et al., 2011)  |
| SRR171682 | MT   | Marine | 203,574        | 224.52      | 113,081 (55.55%)    | (Ottesen et al., 2011)  |
| SRR060835 | MT   | Human  | 55,017         | 243.45      | 22,154 (40.27%)     | (Gosalbes et al., 2011) |
| SRR060836 | MT   | Human  | 46,375         | 297.81      | 26,204 (56.50%)     | (Gosalbes et al., 2011) |
| SRR060837 | MT   | Human  | 32,993         | 216.66      | 11,773 (35.68%)     | (Gosalbes et al., 2011) |
| SRR060838 | MT   | Human  | 18,548         | 188.43      | 4,016 (21.65%)      | (Gosalbes et al., 2011) |
| SRR060839 | MT   | Human  | 16,529         | 223.75      | 5,515 (33.37%)      | (Gosalbes et al., 2011) |
| SRR060840 | MT   | Human  | 19,656         | 209.35      | 6,426 (32.69%)      | (Gosalbes et al., 2011) |
| SRR060841 | MT   | Human  | 65,658         | 274.25      | 32,649 (49.73%)     | (Gosalbes et al., 2011) |
| SRR060842 | MT   | Human  | 61,138         | 308.15      | 34,345 (56.18%)     | (Gosalbes et al., 2011) |
| SRR060843 | MT   | Human  | 30,836         | 312.28      | 18,174 (58.94%)     | (Gosalbes et al., 2011) |
| SRR060844 | MT   | Human  | 26,583         | 290.87      | 14,880 (55.98%)     | (Gosalbes et al., 2011) |
| SRR059252 | MT   | Marine | 221,751        | 264.58      | 134,637 (60.72%)    | (McCarren et al., 2010) |
| SRR059257 | MT   | Marine | 230,376        | 263.24      | 136,884 (59.42%)    | (McCarren et al., 2010) |
| SRR059258 | MT   | Marine | 251,690        | 261.49      | 151,589 (60.23%)    | (McCarren et al., 2010) |
| ERR016008 | 16S  | Mouse  | 38,114         | 413.92      | 11,885 (31.18%)     | -                       |

## Reference database

The sequences for the reference database were retrieved from the latest version (as of 10/16/2011) of SILVA (Pruesse *et al.*, 2007), RDP (Cole *et al.*, 2009), Greengenes (DeSantis *et al.*, 2006), Rfam (Gardner *et al.*, 2011), NCBI (Sayers *et al.*, 2011), and HMP DACC (The NIH HMP Working Group *et al.*, 2009). The sequences were combined into a single file and duplicates removed with PRINSEQ using the following command:

```
$ perl prinseq-lite.pl -log -verbose -derep 12345 -fasta <file.fasta> -
out_good rrnadb -out_bad null
```

The database was formatted for BLAST and riboPicker using the following commands:

```
$ formatdb -i rrnadb.fasta -p F -o T -n rrnadb -s T
$ bwa64 index -p rrnadb rrnadb.fasta
```

## Results

The outputs of the programs were parsed to identify rRNA-like sequences using a coverage threshold of 50% and an identity threshold of 75% for BLASTn and riboPicker, and an e-value threshold of  $10^{-5}$  for meta\_rna3, as there is no information about the sequence similarity available.

**Table 2:** Results of the programs showing the number of sequences correctly identified as rRNA and non-rRNA sequence in the 27 simulated datasets.

| Read length | Error rate | BLASTn |          | riboPicker |          | meta_rna3 |          |
|-------------|------------|--------|----------|------------|----------|-----------|----------|
|             |            | rRNA   | non-rRNA | rRNA       | non-rRNA | rRNA      | non-rRNA |
| 200         | 0%         | 5,000  | 45,000   | 5,000      | 45,000   | 4,981     | 44,996   |
| 200         | 0%         | 5,000  | 45,000   | 5,000      | 45,000   | 4,975     | 44,999   |
| 200         | 0%         | 5,000  | 45,000   | 5,000      | 45,000   | 4,976     | 44,999   |
| 200         | 2%         | 5,000  | 45,000   | 4,995      | 45,000   | 4,979     | 44,996   |
| 200         | 2%         | 4,999  | 45,000   | 4,991      | 45,000   | 4,975     | 44,999   |
| 200         | 2%         | 5,000  | 45,000   | 4,993      | 45,000   | 4,974     | 44,999   |
| 200         | 5%         | 5,000  | 45,000   | 4,983      | 45,000   | 4,977     | 44,995   |
| 200         | 5%         | 5,000  | 45,000   | 4,989      | 45,000   | 4,973     | 44,998   |
| 200         | 5%         | 5,000  | 45,000   | 4,988      | 45,000   | 4,974     | 45,000   |
| 350         | 0%         | 5,000  | 45,000   | 5,000      | 45,000   | 4,982     | 44,999   |
| 350         | 0%         | 5,000  | 45,000   | 5,000      | 45,000   | 4,985     | 44,996   |
| 350         | 0%         | 5,000  | 45,000   | 5,000      | 45,000   | 4,982     | 44,997   |
| 350         | 2%         | 5,000  | 45,000   | 4,991      | 45,000   | 4,982     | 44,999   |
| 350         | 2%         | 5,000  | 45,000   | 4,992      | 45,000   | 4,985     | 44,998   |
| 350         | 2%         | 5,000  | 45,000   | 4,992      | 45,000   | 4,982     | 44,999   |
| 350         | 5%         | 5,000  | 45,000   | 4,992      | 45,000   | 4,981     | 44,999   |
| 350         | 5%         | 5,000  | 45,000   | 4,991      | 45,000   | 4,985     | 44,999   |
| 350         | 5%         | 5,000  | 45,000   | 4,985      | 45,000   | 4,982     | 45,000   |
| 500         | 0%         | 5,000  | 45,000   | 5,000      | 45,000   | 4,985     | 44,996   |
| 500         | 0%         | 5,000  | 45,000   | 5,000      | 45,000   | 4,988     | 44,998   |
| 500         | 0%         | 5,000  | 45,000   | 5,000      | 45,000   | 4,981     | 44,999   |
| 500         | 2%         | 4,999  | 45,000   | 4,990      | 45,000   | 4,985     | 44,997   |
| 500         | 2%         | 5,000  | 45,000   | 4,997      | 45,000   | 4,988     | 44,998   |
| 500         | 2%         | 5,000  | 45,000   | 4,993      | 45,000   | 4,981     | 44,999   |
| 500         | 5%         | 5,000  | 45,000   | 4,986      | 45,000   | 4,985     | 44,998   |
| 500         | 5%         | 4,999  | 45,000   | 4,987      | 45,000   | 4,988     | 44,999   |
| 500         | 5%         | 5,000  | 45,000   | 4,993      | 45,000   | 4,980     | 45,000   |

**Table 3:** Prediction sensitivity and accuracy (in percentage) of the three programs for the 27 simulated datasets.

| Read length | Error rate | Sensitivity |            |           | Accuracy |            |           |
|-------------|------------|-------------|------------|-----------|----------|------------|-----------|
|             |            | BLASTn      | riboPicker | meta_rna3 | BLASTn   | riboPicker | meta_rna3 |
| 200         | 0%         | 100.00      | 100.00     | 99.62     | 100.00   | 100.00     | 99.95     |
| 200         | 0%         | 100.00      | 100.00     | 99.50     | 100.00   | 100.00     | 99.95     |
| 200         | 0%         | 100.00      | 100.00     | 99.52     | 100.00   | 100.00     | 99.95     |
| 200         | 2%         | 100.00      | 99.90      | 99.58     | 100.00   | 99.99      | 99.95     |
| 200         | 2%         | 99.98       | 99.82      | 99.50     | 100.00   | 99.98      | 99.95     |
| 200         | 2%         | 100.00      | 99.86      | 99.48     | 100.00   | 99.99      | 99.95     |
| 200         | 5%         | 100.00      | 99.66      | 99.54     | 100.00   | 99.97      | 99.94     |
| 200         | 5%         | 100.00      | 99.78      | 99.46     | 100.00   | 99.98      | 99.94     |
| 200         | 5%         | 100.00      | 99.76      | 99.48     | 100.00   | 99.98      | 99.95     |
| 350         | 0%         | 100.00      | 100.00     | 99.64     | 100.00   | 100.00     | 99.96     |
| 350         | 0%         | 100.00      | 100.00     | 99.70     | 100.00   | 100.00     | 99.96     |
| 350         | 0%         | 100.00      | 100.00     | 99.64     | 100.00   | 100.00     | 99.96     |
| 350         | 2%         | 100.00      | 99.82      | 99.64     | 100.00   | 99.98      | 99.96     |
| 350         | 2%         | 100.00      | 99.84      | 99.70     | 100.00   | 99.98      | 99.97     |
| 350         | 2%         | 100.00      | 99.84      | 99.64     | 100.00   | 99.98      | 99.96     |
| 350         | 5%         | 100.00      | 99.84      | 99.62     | 100.00   | 99.98      | 99.96     |
| 350         | 5%         | 100.00      | 99.82      | 99.70     | 100.00   | 99.98      | 99.97     |
| 350         | 5%         | 100.00      | 99.70      | 99.64     | 100.00   | 99.97      | 99.96     |
| 500         | 0%         | 100.00      | 100.00     | 99.70     | 100.00   | 100.00     | 99.96     |
| 500         | 0%         | 100.00      | 100.00     | 99.76     | 100.00   | 100.00     | 99.97     |
| 500         | 0%         | 100.00      | 100.00     | 99.62     | 100.00   | 100.00     | 99.96     |
| 500         | 2%         | 99.98       | 99.80      | 99.70     | 100.00   | 99.98      | 99.96     |
| 500         | 2%         | 100.00      | 99.94      | 99.76     | 100.00   | 99.99      | 99.97     |
| 500         | 2%         | 100.00      | 99.86      | 99.62     | 100.00   | 99.99      | 99.96     |
| 500         | 5%         | 100.00      | 99.72      | 99.70     | 100.00   | 99.97      | 99.97     |
| 500         | 5%         | 99.98       | 99.74      | 99.76     | 100.00   | 99.97      | 99.97     |
| 500         | 5%         | 100.00      | 99.86      | 99.60     | 100.00   | 99.99      | 99.96     |

**Table 4:** Results of the programs BLASTn (B), riboPicker (R), and meta\_rna3 (M) showing the number of sequences identified as rRNA-like in the publicly available real datasets. All numbers are exclusive. Column "Any" shows the number of identified rRNA-like sequences across all three programs.

| SRA ID    | B   | R  | M     | B+R   | B+M | R+M | B+R+M   | Any     |
|-----------|-----|----|-------|-------|-----|-----|---------|---------|
| SRR059252 | 241 | 10 | 1,606 | 1,054 | 851 | 29  | 120,212 | 124,003 |
| SRR059257 | 281 | 9  | 1,299 | 961   | 847 | 28  | 121,236 | 124,661 |
| SRR059258 | 54  | 1  | 1,173 | 206   | 594 | 16  | 136,003 | 138,047 |
| SRR060835 | 0   | 0  | 558   | 6     | 125 | 3   | 21,440  | 22,132  |
| SRR060836 | 0   | 0  | 496   | 15    | 43  | 14  | 25,624  | 26,192  |
| SRR060837 | 1   | 0  | 361   | 22    | 179 | 2   | 11,194  | 11,759  |
| SRR060838 | 0   | 0  | 124   | 2     | 45  | 2   | 3,835   | 4,008   |
| SRR060839 | 0   | 0  | 109   | 4     | 28  | 0   | 5,371   | 5,512   |
| SRR060840 | 0   | 0  | 192   | 17    | 82  | 4   | 6,128   | 6,423   |
| SRR060841 | 1   | 0  | 792   | 39    | 354 | 5   | 31,432  | 32,623  |
| SRR060842 | 1   | 0  | 835   | 43    | 261 | 15  | 33,156  | 34,311  |
| SRR060843 | 0   | 0  | 902   | 5     | 721 | 11  | 16,519  | 18,158  |
| SRR060844 | 0   | 0  | 587   | 4     | 257 | 8   | 14,010  | 14,866  |
| SRR099253 | 615 | 52 | 1,046 | 3,550 | 496 | 20  | 53,420  | 59,199  |
| SRR099254 | 842 | 61 | 1,478 | 4,825 | 655 | 18  | 57,444  | 65,323  |
| SRR171682 | 741 | 7  | 1,832 | 3,255 | 478 | 21  | 36,489  | 42,823  |
| SRR171683 | 307 | 3  | 886   | 1,723 | 284 | 15  | 18,446  | 21,664  |
| ERR016008 | 0   | 0  | 1     | 0     | 1   | 0   | 11,883  | 11,885  |

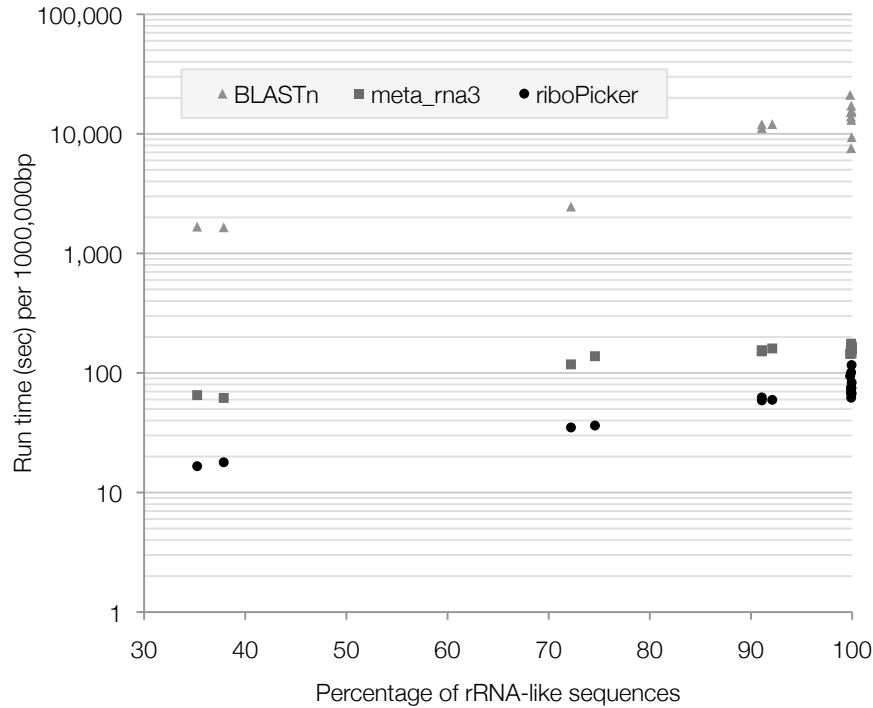

**Figure 1:** Graph showing the required time to process  $10^6$  bp of metatranscriptomic sequence data against the percentage of rRNA-like sequences identified in each dataset. The data shows that riboPicker processes the real datasets more than twice as fast as meta\_rna3 and more than 100 times faster than BLASTn.

## References

- Cole, J.R. et al. (2009) The Ribosomal Database Project: improved alignments and new tools for rRNA analysis. *Nucleic Acids Res.*, **37**, D141-145.
- DeSantis, T.Z. et al. (2006) Greengenes, a chimera-checked 16S rRNA gene database and workbench compatible with ARB. *Appl. Environ. Microbiol.*, **72**, 5069-5072.
- Gardner, P.P. et al. (2011) Rfam: Wikipedia, clans and the "decimal" release. *Nucleic Acids Res.*, **39**, D141-145.
- Gosalbes, M.J. et al. (2011) Metatranscriptomic approach to analyze the functional human gut microbiota. *PLoS ONE*, **6**, e17447.
- McCarren, J. et al. (2010) Microbial community transcriptomes reveal microbes and metabolic pathways associated with dissolved organic matter turnover in the sea. *Proc. Natl. Acad. Sci. U.S.A.*, **107**, 16420-16427.
- Ottesen, E.A. et al. (2011) Metatranscriptomic analysis of autonomously collected and preserved marine bacterioplankton. *The ISME Journal*.
- The NIH HMP Working Group et al. (2009) The NIH Human Microbiome Project. *Genome Res.*, **19**, 2317-2323.
- Pruesse, E. et al. (2007) SILVA: a comprehensive online resource for quality checked and aligned ribosomal RNA sequence data compatible with ARB. *Nucleic Acids Res*, **35**, 7188-7196.
- Sayers, E.W. et al. (2011) Database resources of the National Center for Biotechnology Information. *Nucleic Acids Res.*, **39**, D38-51.
- Schmieder, R. and Edwards, R. (2011) Quality control and preprocessing of metagenomic datasets. *Bioinformatics*, **27**, 863-864.
